# Supplementary material
Source: Springer Nature journal article supplement (https://www.springermedizin.de/resource/supplementary/13017_2013_377_MOESM3_ESM.pdf/9636060)
Supplement: MOESM3 [file 9636060]

Sigmoid volvulus

A  
N  
D

pregnancy

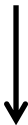

976

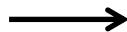

954  
Titles did not  
relate to sigmoid  
volvulus in pregnancy

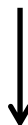

22

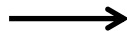

Articles included
